# Supplementary material for: Salicylic Acid and Risk of Colorectal Cancer: A Two-Sample Mendelian Randomization Study
Source: MDPI journal article supplement (doi:10.3390/nu13114164), 2021-11-21
Supplement: s1 [file s1]

## Supplementary information

Supplementary Table S1- Enzyme genomic regions based on NCBI Build 37/UCSC hg19.

| Gene            | Chromosome | Start site  | End site    |
|-----------------|------------|-------------|-------------|
| <i>BChE</i>     | 3          | 165,490,692 | 165,555,260 |
| <i>PAFAH1B2</i> | 11         | 117,014,983 | 117,047,610 |
| <i>PAFAH1B3</i> | 19         | 42,297,033  | 42,303,546  |
| <i>UGT1A6</i>   | 2          | 234,600,253 | 234,681,946 |
| <i>CYP2C9</i>   | 10         | 96,698,415  | 96,749,147  |
| <i>ACSM2B</i>   | 16         | 20,547,548  | 20,587,749  |

Supplementary Table S2- Associations of the 4 functional SNPs with salicylic acid

| SNP              | Metabolite     | Effect allele | Other allele | Beta                  | SE                    | LCI                    | UCI  | EAF  | Chr | Position  | P value | Sample size | Gene          |
|------------------|----------------|---------------|--------------|-----------------------|-----------------------|------------------------|------|------|-----|-----------|---------|-------------|---------------|
| <b>rs6445035</b> | Salicylic acid | A             | G            | $8.71 \times 10^{-3}$ | $1.49 \times 10^{-2}$ | -0.02                  | 0.04 | 0.20 | 3   | 165480100 | 0.56    | 14149       | <i>BChE</i>   |
| <b>rs2070959</b> | Salicylic acid | G             | A            | 0.01                  | $1.28 \times 10^{-2}$ | -0.01                  | 0.04 | 0.32 | 2   | 234602191 | 0.30    | 14149       | <i>UGT1A6</i> |
| <b>rs1105879</b> | Salicylic acid | C             | A            | 0.02                  | $1.26 \times 10^{-2}$ | $-6.79 \times 10^{-3}$ | 0.04 | 0.34 | 2   | 234602202 | 0.16    | 14149       | <i>UGT1A6</i> |
| <b>rs1799853</b> | Salicylic acid | T             | C            | -0.02                 | $1.75 \times 10^{-2}$ | -0.06                  | 0.01 | 0.14 | 10  | 96702047  | 0.21    | 14149       | <i>CYP2C9</i> |

Supplementary Table S3-Pathway SNP associations with salicylic acid

| SNP                | Effect allele | Other allele | Beta  | SE   | LCI   | UCI  | EAf    | Direction | Chr | Position | P value                 | Sample size | LD clumping R <sup>2</sup> |
|--------------------|---------------|--------------|-------|------|-------|------|--------|-----------|-----|----------|-------------------------|-------------|----------------------------|
| <b>rs8062555</b>   | C             | G            | -0.27 | 0.04 | -0.35 | 1.74 | 0.9792 | --        | 16  | 20566287 | 2.07x10 <sup>-10</sup>  | 14149       | 0.001 and 0.8              |
| <b>rs9922093</b>   | T             | C            | -0.18 | 0.03 | -0.24 | 1.82 | 0.9666 | --        | 16  | 20568843 | 1.01 x10 <sup>-07</sup> | 14149       | 0.001 and 0.8              |
| <b>rs146980165</b> | A             | T            | 0.24  | 0.05 | 0.15  | 2.25 | 0.0168 | ++        | 16  | 20576746 | 2.42 x10 <sup>-07</sup> | 14149       | 0.8                        |
| <b>rs7499557</b>   | T             | G            | -0.25 | 0.04 | -0.34 | 1.75 | 0.9788 | --        | 16  | 20557620 | 1.29 x10 <sup>-09</sup> | 14149       | 0.8                        |
| <b>rs7500194</b>   | A             | G            | 0.08  | 0.02 | 0.05  | 2.06 | 0.8573 | ++        | 16  | 20549505 | 1.90x10 <sup>-06</sup>  | 14149       | 0.8                        |
| <b>rs8056693</b>   | T             | C            | 0.18  | 0.04 | 0.11  | 2.18 | 0.0298 | ++        | 16  | 20570661 | 2.94x10 <sup>-07</sup>  | 14149       | 0.8                        |

Abbreviations: SE, standard error; LCI, lower confidence interval; UCI, upper confidence interval; Chr, chromosome; LD, linkage disequilibrium.

Supplementary Table S4-Pathway SNP associations with colorectal cancer

| Sample           | SNP         | Effect allele | Other allele | Beta   | SE    | LCI    | UCI   | EAf   | Direction | Chr | Position | P value | Sample size |
|------------------|-------------|---------------|--------------|--------|-------|--------|-------|-------|-----------|-----|----------|---------|-------------|
| <b>GECCO</b>     | rs8062555   | C             | G            | 0.012  | 0.028 | -0.043 | 0.067 | 0.967 | -+----    | 16  | 20566287 | 0.67    | 120328      |
|                  | rs9922093   | T             | C            | -0.030 | 0.025 | -0.079 | 0.018 | 0.967 | +-----    | 16  | 20568843 | 0.22    | 120328      |
|                  | rs146980165 | A             | T            | -0.018 | 0.033 | -0.082 | 0.046 | 0.026 | +-+--+    | 16  | 20576746 | 0.59    | 120328      |
|                  | rs7499557   | T             | G            | 0.017  | 0.030 | -0.042 | 0.075 | 0.969 | -+----    | 16  | 20557620 | 0.57    | 120328      |
|                  | rs7500194   | A             | G            | -0.005 | 0.013 | -0.030 | 0.020 | 0.848 | +-----    | 16  | 20549505 | 0.71    | 120328      |
|                  | rs8056693   | T             | C            | 0.035  | 0.026 | -0.016 | 0.086 | 0.030 | -+----    | 16  | 20570661 | 0.18    | 120328      |
| <b>DACHS all</b> | rs8062555   | G             | C            | -0.016 | 0.110 | -0.233 | 0.200 | 0.021 | NA        | 16  | 20566287 | 0.88    | 7851        |
|                  | rs9922093   | C             | T            | 0.059  | 0.092 | -0.122 | 0.240 | 0.032 | NA        | 16  | 20568843 | 0.52    | 7851        |
|                  | rs146980165 | A             | T            | 0.053  | 0.125 | -0.192 | 0.299 | 0.017 | NA        | 16  | 20576746 | 0.67    | 7851        |
|                  | rs7499557   | G             | T            | 0.018  | 0.113 | -0.203 | 0.238 | 0.021 | NA        | 16  | 20557620 | 0.87    | 7851        |
|                  | rs7500194   | G             | A            | 0.010  | 0.046 | -0.080 | 0.099 | 0.141 | NA        | 16  | 20549505 | 0.83    | 7851        |

|                                             |                 |   |   |        |       |        |       |       |    |    |          |      |       |
|---------------------------------------------|-----------------|---|---|--------|-------|--------|-------|-------|----|----|----------|------|-------|
|                                             | rs8056693       | T | C | 0.077  | 0.096 | -0.112 | 0.266 | 0.029 | NA | 16 | 20570661 | 0.42 | 7851  |
| <b>DACHS<br/>aspirin<br/>users</b>          | rs8062555       | G | C | -0.041 | 0.244 | -0.519 | 0.438 | 0.021 | NA | 16 | 20566287 | 0.87 | 1589  |
|                                             | rs9922093       | C | T | 0.009  | 0.196 | -0.375 | 0.393 | 0.034 | NA | 16 | 20568843 | 0.96 | 1589  |
|                                             | rs14698016<br>5 | A | T | -0.044 | 0.263 | -0.559 | 0.472 | 0.018 | NA | 16 | 20576746 | 0.87 | 1589  |
|                                             | rs7499557       | G | T | 0.056  | 0.250 | -0.433 | 0.546 | 0.020 | NA | 16 | 20557620 | 0.82 | 1589  |
|                                             | rs7500194       | G | A | -0.007 | 0.104 | -0.210 | 0.197 | 0.131 | NA | 16 | 20549505 | 0.95 | 1589  |
|                                             | rs8056693       | T | C | 0.029  | 0.200 | -0.364 | 0.422 | 0.033 | NA | 16 | 20570661 | 0.88 | 1589  |
|                                             | rs8062555       | G | C | -0.025 | 0.131 | -0.282 | 0.232 | 0.022 | NA | 16 | 20566287 | 0.85 | 5,660 |
| <b>DACHS<br/>aspirin<br/>non-<br/>users</b> | rs9922093       | C | T | 0.128  | 0.112 | -0.092 | 0.347 | 0.031 | NA | 16 | 20568843 | 0.25 | 5,660 |
|                                             | rs14698016<br>5 | A | T | 0.070  | 0.152 | -0.228 | 0.368 | 0.016 | NA | 16 | 20576746 | 0.64 | 5,660 |
|                                             | rs7499557       | G | T | -0.003 | 0.134 | -0.266 | 0.259 | 0.021 | NA | 16 | 20557620 | 0.98 | 5,660 |
|                                             | rs7500194       | G | A | 0.002  | 0.054 | -0.104 | 0.109 | 0.142 | NA | 16 | 20549505 | 0.96 | 5,660 |
|                                             | rs8056693       | T | C | 0.147  | 0.118 | -0.084 | 0.378 | 0.028 | NA | 16 | 20570661 | 0.21 | 5,660 |

Supplementary Table S5- Pathway SNP associations with CRC using the other MR methods

| Study                          | Method                                   | N SNPs | OR   | LCI                   | UCI  | P value               |
|--------------------------------|------------------------------------------|--------|------|-----------------------|------|-----------------------|
| <b>GECCO</b>                   | MR Egger                                 | 6      | 0.99 | 0.78                  | 1.27 | 0.97                  |
|                                | MR Egger (accounting for LD correlation) |        | 1.15 | 0.98                  | 1.36 | 0.09                  |
|                                | Weighted median                          |        | 0.95 | 0.83                  | 1.09 | 0.45                  |
|                                | Inverse variance weighted                |        | 1.01 | 0.91                  | 1.12 | 0.88                  |
|                                | Weighted mode                            |        | 0.94 | 0.80                  | 1.12 | 0.53                  |
| <b>DACHS all</b>               | MR Egger                                 | 6      | 1.25 | 0.52                  | 3.02 | 0.64                  |
|                                | MR Egger (accounting for LD correlation) |        | 0.27 | 0.11                  | 0.67 | 4.78x10 <sup>-3</sup> |
|                                | Weighted median                          |        | 1.11 | 0.70                  | 1.75 | 0.67                  |
|                                | Inverse variance weighted                |        | 1.14 | 0.77                  | 1.68 | 0.53                  |
|                                | Weighted mode                            |        | 1.01 | 0.55                  | 1.84 | 0.98                  |
| <b>DACHS aspirin users</b>     | MR Egger                                 | 6      | 0.95 | 0.13                  | 6.69 | 0.96                  |
|                                | MR Egger (accounting for LD correlation) |        | 0.02 | 2.17x10 <sup>-3</sup> | 0.13 | 9.45x10 <sup>-5</sup> |
|                                | Weighted median                          |        | 1.06 | 0.39                  | 2.91 | 0.90                  |
|                                | Inverse variance weighted                |        | 1.02 | 0.44                  | 2.40 | 0.96                  |
|                                | Weighted mode                            |        | 1.14 | 0.32                  | 4.03 | 0.84                  |
| <b>DACHS aspirin non-users</b> | MR Egger                                 | 6      | 1.26 | 0.44                  | 3.61 | 0.68                  |
|                                | MR Egger (accounting for LD correlation) |        | 0.46 | 0.18                  | 1.13 | 0.09                  |
|                                | Weighted median                          |        | 1.02 | 0.57                  | 1.83 | 0.94                  |
|                                | Inverse variance weighted                |        | 1.26 | 0.78                  | 2.01 | 0.35                  |
|                                | Weighted mode                            |        | 0.97 | 0.45                  | 2.11 | 0.94                  |

Abbreviations: OR, odds ratio; LCI, lower confidence interval; UCI, upper confidence interval.

Supplementary Table S6- Results of the Q statistic heterogeneity test for pathway SNPs

| Study                         | Method   | Q statistic | Degrees of freedom | P value |
|-------------------------------|----------|-------------|--------------------|---------|
| <b>GECCO</b>                  | MR Egger | 4.20        | 4                  | 0.38    |
|                               | IVW      | 4.21        | 5                  | 0.52    |
| <b>DACHS all</b>              | MR Egger | 0.86        | 4                  | 0.93    |
|                               | IVW      | 0.92        | 5                  | 0.97    |
| <b>DACHS aspirin user</b>     | MR Egger | 0.12        | 4                  | 1.00    |
|                               | IVW      | 0.13        | 5                  | 1.00    |
| <b>DACHS aspirin non-user</b> | MR Egger | 2.21        | 4                  | 0.70    |
|                               | IVW      | 2.21        | 5                  | 0.82    |

Supplementary Table S7- MR Steiger test results

| Analysis    | Dataset                | Clumping (R2) | N SNPs | snp_r2.exposure | snp_r2.outcome | correct_causal_direction | steiger_pval |
|-------------|------------------------|---------------|--------|-----------------|----------------|--------------------------|--------------|
| Pathway     | GECCO                  | 0.001         | 2      | 0.1019819       | 0.00106105     | TRUE                     | 5.50E-247    |
|             |                        | 0.8           | 6      | 0.263845        | 0.00291445     | TRUE                     | 0            |
|             | DACHS all              | 0.001         | 2      | 0.1019819       | 0.003752854    | TRUE                     | 9.16E-82     |
|             |                        | 0.8           | 6      | 0.263845        | 0.01296463     | TRUE                     | 1.38E-227    |
|             | DACHS aspirin user     | 0.001         | 2      | 0.1019819       | 0.001731796    | TRUE                     | 8.82E-28     |
|             |                        | 0.8           | 6      | 0.263845        | 0.007709451    | TRUE                     | 2.49E-73     |
|             | DACHS aspirin non-user | 0.001         | 2      | 0.1019819       | 0.01694397     | TRUE                     | 4.93E-37     |
|             |                        | 0.8           | 6      | 0.263845        | 0.04351382     | TRUE                     | 2.23E-113    |
| Genome-wide | GECCO                  | 0.001         | 1      | 0.0170075       | 9.41E-05       | TRUE                     | 1.64E-42     |
|             |                        | 0.8           | 4      | 0.1846267       | 0.00158571     | TRUE                     | 0.00E+00     |
|             | DACHS all              | 0.001         | 1      | 0.0170075       | 2.97E-06       | TRUE                     | 3.71E-20     |
|             |                        | 0.8           | 4      | 0.1846267       | 0.002836863    | TRUE                     | 3.93E-183    |
|             | DACHS aspirin user     | 0.001         | 1      | 0.0170075       | 0.002832002    | TRUE                     | 0.003265884  |
|             |                        | 0.8           | 4      | 0.1846267       | 0.01445678     | TRUE                     | 1.86E-37     |
|             | DACHS aspirin non-user | 0.001         | 1      | 0.0170075       | 0.000210312    | TRUE                     | 1.21E-13     |
|             |                        | 0.8           | 4      | 0.1846267       | 0.008855774    | TRUE                     | 3.57E-119    |

Supplementary Table S8- Genome-wide SNP associations with salicylic acid

| SNP        | Effect allele | Other allele | Beta  | SE   | LCI   | UCI   | EAF  | Direction | Chr | Position | P value                 | Sample size | LD clumping R <sup>2</sup> |
|------------|---------------|--------------|-------|------|-------|-------|------|-----------|-----|----------|-------------------------|-------------|----------------------------|
| rs7498776  | T             | C            | -0.13 | 0.02 | -0.17 | -0.09 | 0.90 | --        | 16  | 20611149 | 8.70 x10 <sup>-11</sup> | 14149       | 0.001 and 0.8              |
| rs11642648 | A             | G            | 0.18  | 0.03 | 0.11  | 0.24  | 0.04 | ++        | 16  | 20610955 | 3.58x10 <sup>-08</sup>  | 14149       | 0.8                        |
| rs7499557  | T             | G            | -0.25 | 0.04 | -0.34 | -0.17 | 0.98 | --        | 16  | 20557620 | 1.29x10 <sup>-09</sup>  | 14149       | 0.8                        |
| rs8062555  | C             | G            | -0.27 | 0.04 | -0.35 | -0.18 | 0.98 | --        | 16  | 20566287 | 2.07 x10 <sup>-10</sup> | 14149       | 0.8                        |

Abbreviations: SE, standard error; LCI, lower confidence interval; UCI, upper confidence interval; Chr, chromosome; LD, linkage disequilibrium.

Supplementary Table S9- Genome-wide SNP associations with colorectal cancer

| Sample                         | SNP        | Effect allele | Other allele | Beta   | SE    | LCI    | UCI   | EAf   | Direction | Chr | Position | P value  | Sample size |
|--------------------------------|------------|---------------|--------------|--------|-------|--------|-------|-------|-----------|-----|----------|----------|-------------|
| <b>GECCO</b>                   | rs7498776  | T             | C            | -0.010 | 0.015 | -0.039 | 0.019 | 0.895 | ---+--    | 16  | 20611149 | 0.5122   | 120328      |
|                                | rs11642648 | A             | G            | 0.033  | 0.024 | -0.014 | 0.079 | 0.036 | -+----    | 16  | 20610955 | 0.1678   | 120328      |
|                                | rs7499557  | T             | G            | 0.017  | 0.030 | -0.042 | 0.075 | 0.969 | -+---+    | 16  | 20557620 | 0.5746   | 120328      |
|                                | rs8062555  | C             | G            | 0.012  | 0.028 | -0.043 | 0.067 | 0.967 | -+---+    | 16  | 20566287 | 0.6747   | 120328      |
| <b>DACHS all</b>               | rs7498776  | C             | T            | 0.002  | 0.055 | -0.106 | 0.109 | 0.093 | NA        | 16  | 20611149 | 0.974898 | 7851        |
|                                | rs11642648 | A             | G            | 0.047  | 0.089 | -0.127 | 0.222 | 0.034 | NA        | 16  | 20610955 | 0.595083 | 7851        |
|                                | rs7499557  | G             | T            | 0.019  | 0.113 | -0.202 | 0.239 | 0.021 | NA        | 16  | 20557620 | 0.867246 | 7851        |
|                                | rs8062555  | G             | C            | -0.015 | 0.110 | -0.232 | 0.201 | 0.021 | NA        | 16  | 20566287 | 0.890538 | 7851        |
| <b>DACHS aspirin users</b>     | rs7498776  | C             | T            | -0.053 | 0.121 | -0.291 | 0.185 | 0.093 | NA        | 16  | 20611149 | 0.660838 | 1589        |
|                                | rs11642648 | A             | G            | 0.082  | 0.193 | -0.296 | 0.461 | 0.035 | NA        | 16  | 20610955 | 0.66917  | 1589        |
|                                | rs7499557  | G             | T            | 0.056  | 0.250 | -0.433 | 0.546 | 0.020 | NA        | 16  | 20557620 | 0.821499 | 1589        |
|                                | rs8062555  | G             | C            | -0.041 | 0.244 | -0.519 | 0.438 | 0.021 | NA        | 16  | 20566287 | 0.868093 | 1589        |
| <b>DACHS aspirin non-users</b> | rs7498776  | C             | T            | 0.015  | 0.065 | -0.113 | 0.142 | 0.094 | NA        | 16  | 20611149 | 0.823269 | 5,660       |
|                                | rs11642648 | A             | G            | 0.090  | 0.108 | -0.121 | 0.300 | 0.033 | NA        | 16  | 20610955 | 0.404607 | 5,660       |
|                                | rs7499557  | G             | T            | -0.003 | 0.134 | -0.265 | 0.259 | 0.021 | NA        | 16  | 20557620 | 0.982292 | 5,660       |
|                                | rs8062555  | G             | C            | -0.025 | 0.131 | -0.282 | 0.233 | 0.022 | NA        | 16  | 20566287 | 0.851039 | 5,660       |

Supplementary Table S10- Genome-wide SNP associations with CRC using the other MR methods

| Study                          | Method                                   | N SNP | OR                    | LCI                   | UCI   | P value               |
|--------------------------------|------------------------------------------|-------|-----------------------|-----------------------|-------|-----------------------|
| <b>GECCO</b>                   | MR Egger                                 | 4     | 0.84                  | 0.58                  | 1.22  | 0.46                  |
|                                | MR Egger (accounting for LD correlation) | 4     | 1.16                  | 0.99                  | 1.38  | 0.08                  |
|                                | Weighted median                          | 4     | 1.00                  | 0.87                  | 1.14  | 0.96                  |
|                                | Inverse variance weighted                | 4     | 1.03                  | 0.92                  | 1.15  | 0.67                  |
|                                | Weighted mode                            | 4     | 0.96                  | 0.80                  | 1.16  | 0.73                  |
| <b>DACHS all</b>               | MR Egger                                 | 4     | 1.00                  | 0.24                  | 4.24  | 1.00                  |
|                                | MR Egger (accounting for LD correlation) | 4     | 0.11                  | 0.04                  | 0.28  | $4.52 \times 10^{-6}$ |
|                                | Weighted median                          | 4     | 1.03                  | 0.64                  | 1.65  | 0.90                  |
|                                | Inverse variance weighted                | 4     | 1.06                  | 0.69                  | 1.63  | 0.79                  |
|                                | Weighted mode                            | 4     | 1.01                  | 0.54                  | 1.89  | 0.98                  |
| <b>DACHS aspirin users</b>     | MR Egger                                 | 4     | 1.60                  | 0.07                  | 38.99 | 0.80                  |
|                                | MR Egger (accounting for LD correlation) | 4     | $2.47 \times 10^{-3}$ | $2.37 \times 10^{-4}$ | 0.03  | $5.07 \times 10^{-7}$ |
|                                | Weighted median                          | 4     | 0.97                  | 0.32                  | 2.96  | 0.96                  |
|                                | Inverse variance weighted                | 4     | 0.99                  | 0.38                  | 2.57  | 0.99                  |
|                                | Weighted mode                            | 4     | 0.85                  | 0.22                  | 3.29  | 0.83                  |
| <b>DACHS aspirin non-users</b> | MR Egger                                 | 4     | 0.82                  | 0.15                  | 4.55  | 0.84                  |
|                                | MR Egger (accounting for LD correlation) | 4     | 0.23                  | 0.10                  | 0.52  | $4.15 \times 10^{-4}$ |
|                                | Weighted median                          | 4     | 1.03                  | 0.58                  | 1.83  | 0.92                  |
|                                | Inverse variance weighted                | 4     | 1.10                  | 0.66                  | 1.84  | 0.71                  |
|                                | Weighted mode                            | 4     | 0.99                  | 0.47                  | 2.06  | 0.98                  |

Abbreviations: OR, odds ratio; LCI, lower confidence interval; UCI, upper confidence interval.

Supplementary Table S11- Results of the Q statistic heterogeneity test for genome-wide SNPs

| Study                          | Method   | Q statistic | Degrees of freedom | P value |
|--------------------------------|----------|-------------|--------------------|---------|
| <b>GECCO</b>                   | MR Egger | 1.46        | 2                  | 0.48    |
|                                | IVW      | 2.64        | 3                  | 0.45    |
| <b>DACHS all</b>               | MR Egger | 0.26        | 2                  | 0.88    |
|                                | IVW      | 0.26        | 3                  | 0.97    |
| <b>DACHS aspirin users</b>     | MR Egger | 0.36        | 2                  | 0.84    |
|                                | IVW      | 0.45        | 3                  | 0.93    |
| <b>DACHS aspirin non-users</b> | MR Egger | 0.52        | 2                  | 0.77    |
|                                | IVW      | 0.64        | 3                  | 0.89    |
